# Supplementary material for: Impact of Exercise Modalities on Peripheral and Central Components of Cardiorespiratory Capacity in Heart Transplantation Patients: A Systematic Review and Meta-Analysis
Source: MDPI journal article supplement (doi:10.3390/medicina58010032), 2021-12-24
Supplement: s1 [file s1]

## Supplementary file

### Search strategy

The search strategy included the cross-checking of the keywords, according to the Medical Subjects Headings (Mesh), from the United States National Library of Medicine. We chose the keywords following the intervention and population criteria and included filters to limit the search only to randomized clinical trials. There was no language restriction. The full electronic search strategy followed the keywords: (i) population: "Heart-Lung Transplantation"[Mesh] OR "Heart Transplantation"[Mesh] (ii) intervention: "Warm-Up Exercise"[Mesh] OR "Cool-Down Exercise"[Mesh] OR "Plyometric Exercise"[Mesh] OR "Exercise Muscle Stretching Exercises"[Mesh] OR "Exercise"[Mesh] OR "Physical Therapy"[Mesh] OR "Exercise Tolerance"[Mesh] OR "Exercise Therapy"[Mesh] OR "Resistance Training"[Mesh] OR "Physical Therapy Specialty "[Mesh] OR "Circuit-Resistance Training"[Mesh] OR "High-Intensity Interval Training"[Mesh]).

The research was limited to Randomized Controlled Trials (RCTs) in humans above 19 years old in the following languages: Dutch, English, French and Portuguese.

The studies were selected according to the Cochrane handbook (25). The authors initially assessed the title and abstract for screening, followed eligibility criteria, including the type of study design, description of the population, and information on interventions.

### Quality of the trials

Quality assessment was performed by two independent reviewers (WCCR and JSF) (and a third reviewer (GCJ) in case of disparities). PEDro scale was used (Table and detailed Pedro score on Electronic Supplemental Material Table S1). On this scale, 11 questions were answered as 'yes' (score 1) or 'no' (score 0) to obtain more information about the internal and external validity of the study and interpretability of the statistical results (Pedro). According to Pedro guidelines, item 1 from the Pedro scale was not used to calculate the score, which resulted in a total score maximum of 10.

According to the Pedro scale, specific quality of the trials information per domain is below in Supplementary table 1.

Table S1 Physiotherapy Evidence Database (PEDro) scores for each of the 12 included studies in the metanalysis.

| Study                     | Study quality criteria |   |   |   |   |   |   |   |    |    | Total |
|---------------------------|------------------------|---|---|---|---|---|---|---|----|----|-------|
|                           | 2                      | 3 | 4 | 5 | 6 | 7 | 8 | 9 | 10 | 11 |       |
| Braith et al. (2008)      | 1                      | 0 | 1 | 0 | 0 | 1 | 0 | 0 | 1  | 1  | 5     |
| Bernardi et al. (2007)    | 1                      | 0 | 1 | 0 | 0 | 0 | 0 | 0 | 1  | 1  | 4     |
| Haykowsky et al. (2009)   | 1                      | 0 | 0 | 0 | 0 | 0 | 1 | 0 | 1  | 1  | 4     |
| Hermann et al. (2011)     | 1                      | 1 | 1 | 0 | 0 | 1 | 1 | 0 | 1  | 1  | 7     |
| Kobachigawa et al. (1999) | 1                      | 1 | 1 | 0 | 0 | 0 | 1 | 0 | 1  | 0  | 5     |
| Nytrøen et al. (2012)     | 1                      | 0 | 1 | 0 | 0 | 0 | 1 | 0 | 1  | 1  | 5     |
| Pascoalino et al. (2014)  | 1                      | 0 | 1 | 0 | 0 | 1 | 1 | 0 | 1  | 1  | 6     |
| Pierce et al. (2008)      | 1                      | 0 | 1 | 0 | 0 | 0 | 0 | 0 | 1  | 1  | 4     |
| Tegtbur et al. (2003)     | 1                      | 0 | 1 | 0 | 0 | 0 | 0 | 0 | 1  | 1  | 4     |
| Wu et al. (2008)          | 1                      | 0 | 1 | 0 | 0 | 0 | 0 | 1 | 1  | 1  | 5     |
| Braith et al. (1998)      | 0                      | 0 | 1 | 0 | 0 | 1 | 0 | 0 | 1  | 1  | 4     |
| Braith et al. (2005)      | 1                      | 0 | 1 | 0 | 0 | 1 | 1 | 0 | 1  | 1  | 6     |
| Dall et al. (2014)        | 1                      | 1 | 1 | 0 | 0 | 1 | 1 | 0 | 1  | 1  | 7     |
| Karapolat et al. (2007)   | 1                      | 0 | 1 | 0 | 0 | 0 | 0 | 0 | 1  | 0  | 3     |

1 = criterion is satisfied; 0 = criterion not satisfied

Supplementary Figure S1: Risk of bias assessed via Rob 2 tool

| THE PER-PROTOCOL EFFECT       |                     |               |               |    |    |    |    |    |         |
|-------------------------------|---------------------|---------------|---------------|----|----|----|----|----|---------|
| Study                         | Experimental        | Comparator    | Outcome       | D1 | D2 | D3 | D4 | D5 | Overall |
| Bernardi 2007                 | MCT-AE              | Control Group | VO2 peak      | +  | ?  | +  | +  | ?  | !       |
| Rustad 2014                   | HIIT                | Control Group | VO2 peak      | +  | +  | +  | ?  | +  | !       |
| Rustad 2014                   | HIIT                | Control Group | HR peak       | +  | ?  | +  | ?  | +  | !       |
| Nitroen 2012                  | HIIT                | Control Group | VO2 peak      | +  | +  | +  | ?  | +  | !       |
| Nitroen 2012                  | HIIT                | Control Group | HR peak       | +  | +  | +  | ?  | +  | !       |
| Nitroen 2012                  | HIIT                | Control Group | Peak SBP      | ?  | +  | +  | !  | +  | !       |
| Nitroen 2012                  | HIIT                | Control Group | Peak DBP      | ?  | +  | +  | !  | ?  | !       |
| Nitroen 2012                  | HIIT                | Control Group | VE/VCO2 slope | ?  | +  | +  | +  | +  | !       |
| Monk-Hansen 2015              | HIIT                | Control Group | VO2 peak      | +  | !  | +  | ?  | +  | !       |
| Monk-Hansen 2015              | HIIT                | Control Group | HR peak       | +  | !  | +  | ?  | +  | !       |
| Pascoalino 2015               | MCT-AE              | Control Group | VO2 peak      | ?  | ?  | +  | ?  | +  | !       |
| Pascoalino 2015               | MCT-AE              | Control Group | VE/VCO2 slope | ?  | ?  | +  | ?  | +  | !       |
| Pascoalino 2015               | MCT-AE              | Control Group | SBP max       | ?  | ?  | +  | ?  | +  | !       |
| Pascoalino 2015               | MCT-AE              | Control Group | DBP max       | ?  | ?  | +  | ?  | +  | !       |
| Pascoalino 2015               | MCT-AE              | Control Group | HR peak       | ?  | ?  | +  | +  | +  | !       |
| Hermann 2011                  | HIIT                | Control Group | VCO2 peak     | +  | ?  | +  | ?  | +  | !       |
| Hermann 2011                  | HIIT                | Control Group | FMD           | ?  | +  | +  | +  | +  | !       |
| Haykowsky 2009                | Combined Training   | Control Group | VCO2 peak     | ?  | +  | +  | ?  | +  | !       |
| Haykowsky 2009                | Combined Training   | Control Group | HR peak       | +  | +  | +  | ?  | +  | !       |
| Haykowsky 2009                | Combined Training   | Control Group | Peak SBP      | ?  | +  | +  | +  | +  | !       |
| Haykowsky 2009                | Combined Training   | Control Group | Peak DBP      | ?  | +  | +  | +  | +  | !       |
| Haykowsky 2009                | Combined Training   | Control Group | FMD           | ?  | ?  | +  | +  | +  | !       |
| Braith 2008                   | MCT-AE              | Control Group | Peak VO2      | ?  | +  | +  | ?  | +  | !       |
| Braith 2008                   | MCT-AE              | Control Group | FMD           | ?  | +  | +  | +  | +  | !       |
| Kobashigawa 1999              | Combined Training   | Control Group | VCO2 peak     | !  | +  | +  | ?  | +  | !       |
| Kobashigawa 1999              | Combined Training   | Control Group | VE/VCO2 slope | !  | +  | +  | ?  | +  | !       |
| Kobashigawa 1999              | Combined Training   | Control Group | HR peak       | !  | +  | +  | ?  | +  | !       |
| Kobashigawa 1999              | Combined Training   | Control Group | sit-to-stand  | !  | +  | +  | ?  | +  | !       |
| Kobashigawa 1999              | Exercise Training   | Control Group | Peak SBP      | !  | +  | +  | ?  | +  | !       |
| Braith 1998                   | Resistance Training | Control       | 1RM           | +  | +  | +  | +  | +  | !       |
| Braith 2005                   | Resistance Training | Control       | 1RM           | ?  | +  | +  | +  | ?  | !       |
| Dall 2014                     | HIIT                | MCT-AE        | VCO2 peak     | +  | +  | +  | +  | ?  | !       |
| Dall 2014                     | HIIT                | MCT-AE        | HR peak       | +  | +  | +  | +  | ?  | !       |
| Nytroen 2019                  | HIIT                | MCT-AE        | VCO2 peak     | ?  | +  | +  | ?  | ?  | !       |
| Nytroen 2019                  | HIIT                | MCT-AE        | HR peak       | ?  | +  | +  | ?  | ?  | !       |
| THE INTENTION-TO-TREAT EFFECT |                     |               |               |    |    |    |    |    |         |
| Study                         | Experimental        | Comparator    | Outcome       | D1 | D2 | D3 | D4 | D5 | Overall |
| Wu 2008                       | Combined Training   | Control Group | VO2 peak      | ?  | +  | +  | +  | ?  | !       |
| Wu 2008                       | Combined Training   | Control Group | HR peak       | ?  | +  | +  | +  | ?  | !       |
| Wu 2008                       | Combined Training   | Control Group | sit-to-stand  | ?  | +  | +  | +  | ?  | !       |

+

Low Risk

?

Some concerns

!

High risk

D1 Randomisation process

D2 Deviations from the intended intervention

D3 Missing outcome data

D4 Measurement of the outcome

D5 Selection of the reported result

-  Low Risk  
 Some concerns  
 High risk
- D1 Randomisation process  
 D2 Deviations from the intended intervention  
 D3 Missing outcome data  
 D4 Measurement of the outcome  
 D5 Selection of the reported result

## Supplementary Figure S2: Summary of Findings Tables with quality of evidence for exercise training compared to control.

| Author(s):<br>Question: Exercise training compared to Control after Heart Transplantation<br>Setting: Tertiary care<br>Biography: Turri-Silva et al, 2020 |                   |                      |                           |                          |                           |                      |                |         |                   |                                                  |                  |            |
|-----------------------------------------------------------------------------------------------------------------------------------------------------------|-------------------|----------------------|---------------------------|--------------------------|---------------------------|----------------------|----------------|---------|-------------------|--------------------------------------------------|------------------|------------|
| Certainty assessment                                                                                                                                      |                   |                      |                           |                          |                           |                      | N. of patients |         | Effect            |                                                  | Certainty        | Importance |
| N. of studies                                                                                                                                             | Study design      | Risk of bias         | Inconsistency             | Indirectness             | Imprecision               | Other considerations | Exercise       | Control | Relative (95% CI) | Absolute (95% CI)                                |                  |            |
| FMD (%)                                                                                                                                                   |                   |                      |                           |                          |                           |                      |                |         |                   |                                                  |                  |            |
| 3                                                                                                                                                         | randomised trials | not serious          | very serious <sup>a</sup> | serious <sup>b</sup>     | serious <sup>c</sup>      | none                 | 38             | 36      | -                 | MD 3.48 higher<br>(0.29 lower to 7.25 higher)    | ⊖○○○<br>VERY LOW |            |
| Ventilatory Equivalent slope (VE/VC02)                                                                                                                    |                   |                      |                           |                          |                           |                      |                |         |                   |                                                  |                  |            |
| 3                                                                                                                                                         | randomised trials | serious <sup>d</sup> | serious <sup>e</sup>      | serious <sup>f</sup>     | very serious <sup>g</sup> | none                 | 55             | 33      | -                 | MD 0.77 higher<br>(0.18 lower to 1.72 higher)    | ⊖○○○<br>VERY LOW |            |
| Oxygen Uptake (VO2 peak)                                                                                                                                  |                   |                      |                           |                          |                           |                      |                |         |                   |                                                  |                  |            |
| 11                                                                                                                                                        | randomised trials | serious <sup>h</sup> | not serious               | not serious <sup>i</sup> | not serious <sup>j</sup>  | none                 | 204            | 161     | -                 | MD 2.88 higher<br>(2.15 higher to 3.61 higher)   | ⊕⊕○○<br>MODERATE |            |
| Oxygen Uptake (VO2 peak) - Aerobic Exercise                                                                                                               |                   |                      |                           |                          |                           |                      |                |         |                   |                                                  |                  |            |
| 8                                                                                                                                                         | randomised trials | serious <sup>h</sup> | not serious               | not serious              | not serious <sup>j</sup>  | none                 | 146            | 112     | -                 | MD 3.44 higher<br>(2.39 higher to 4.49 higher)   | ⊕⊕○○<br>MODERATE |            |
| Oxygen Uptake (VO2 peak) - Combined exercise                                                                                                              |                   |                      |                           |                          |                           |                      |                |         |                   |                                                  |                  |            |
| 3                                                                                                                                                         | randomised trials | not serious          | not serious               | not serious              | not serious <sup>j</sup>  | none                 | 58             | 49      | -                 | MD 2.36 higher<br>(1.35 higher to 3.37 higher)   | ⊕⊕⊕⊕<br>HIGH     |            |
| Peak Systolic Blood Pressure (mmHg)                                                                                                                       |                   |                      |                           |                          |                           |                      |                |         |                   |                                                  |                  |            |
| 4                                                                                                                                                         | randomised trials | not serious          | very serious <sup>a</sup> | serious <sup>k</sup>     | very serious <sup>l</sup> | none                 | 91             | 67      | -                 | MD 7.87 higher<br>(18.64 lower to 34.39 higher)  | ⊖○○○<br>VERY LOW |            |
| Peak Heart Rate                                                                                                                                           |                   |                      |                           |                          |                           |                      |                |         |                   |                                                  |                  |            |
| 8                                                                                                                                                         | randomised trials | serious <sup>m</sup> | very serious <sup>a</sup> | not serious              | serious <sup>n</sup>      | none                 | 141            | 120     | -                 | MD 5.41 higher<br>(0.19 higher to 10.63 higher)  | ⊖○○○<br>VERY LOW |            |
| Maximum Repetition (1 RM)                                                                                                                                 |                   |                      |                           |                          |                           |                      |                |         |                   |                                                  |                  |            |
| 2                                                                                                                                                         | randomised trials | not serious          | serious <sup>o</sup>      | not serious              | serious <sup>p</sup>      | none                 | 28             | 26      | -                 | MD 35.5 higher<br>(19.42 higher to 51.59 higher) | ⊕○○○<br>LOW      |            |
| Sit-to-stand Test                                                                                                                                         |                   |                      |                           |                          |                           |                      |                |         |                   |                                                  |                  |            |
| 2                                                                                                                                                         | randomised trials | not serious          | serious <sup>q</sup>      | not serious              | serious <sup>p</sup>      | none                 | 28             | 36      | -                 | MD 5.54 higher<br>(3.07 higher to 8.01 higher)   | ⊕○○○<br>LOW      |            |
| Peak Diastolic Blood Pressure (mmHg)                                                                                                                      |                   |                      |                           |                          |                           |                      |                |         |                   |                                                  |                  |            |
| 3                                                                                                                                                         | randomised trials | not serious          | very serious <sup>a</sup> | not serious              | serious <sup>r</sup>      | none                 | 79             | 56      | -                 | MD 6.9 lower<br>(14.61 lower to 1.02 higher)     | ⊕○○○<br>VERY LOW |            |

CI: Confidence interval; MD: Mean difference

### Explanations

- All criteria for inconsistency were violated. The authors believe it can be influenced by different exercise prescriptions (modalities and training intensities).
- Indirectness can be related to differences in intervention, population or outcomes measurements. Along those 3 included studies, Braith 2007 applied aerobic training with moderate intensity, Haykowsky 2009 applied combined training (AER+RES) and Hermann 2011 applied HIT modality. However, there were no relevant variations regarding the assessments and matched population that could have influenced the external validity.
- Considering not dichotomic outcomes, all data from imprecision were based on confidence interval and sample size. Braith, 2008 and Haykowsky, 2009 presented both positive and negative results (crossed neutral line). Furthermore, considering the small general sample size the authors rate down for imprecision.
- Unclear randomization and allocation concealed procedure for Bernardi, 2007. Also, although a detailed description of randomization procedure in Pascoalino, 2014, there is a big difference in relation to sample size in between intervention group and control group. Considering these limitations the authors believe there is a serious limitation for VE/VC02 evidence.
- Although low heterogeneity, point estimates varied widely across the 2 included studies and showed minimal overlap.
- Indirectness can be related to differences in intervention. Just 2 studies were included for this outcome and they varied regarding the intervention duration. Nitroen 2012 did the double time of intervention than Pascoalino 2014 ( 24 vs 12 weeks, respectively). Also, Nitroen 2012 applied HIT intervention, while Pascoalino 2014 used aerobic, moderate intensity.
- Considering not dichotomic outcomes, all data from imprecision were based on confidence interval and sample size. Considering just 2 studies included the outcome VE/VC02 slope presenting wide variation on their confidence interval with positive and negative results, the authors rate down for imprecision.
- There are 5 studies considering with serious risk of bias and 1 study with very serious risk of bias. All them without a clear randomization procedure and allocation concealed (Pierce, 2007; Pascoalino, 2014; Braith, 2007; Bernardi, 2007; Tegtbur, 2003). However, Pierce, 2007 and Braith, 2007 presented a big loss of follow-up (> or equal 20%). There was no blinding, even for statistic analysis in all papers included. The other included studies presented no serious risk of bias (Haykowsky, 2009; Kobashigawa, 1999; Monk-Hansen, 2013; Rustad, 2014; Nitroen, 2012; Hermann, 2011).
- Indirectness can be related to differences in intervention. In outcomes or population. Even considering differences in training modalities (both aerobic and combined training included), training intensities (HIT and moderate intensity) and some differences in regards the cardiopulmonary exercise testing methodology, the authors believe there is no reason to rate down for indirectness. This because none of those criteria were able to affect the overall comparison for VO2 peak.
- Considering not dichotomic outcomes, all data from imprecision were based on confidence intervals and sample size. Even considering the variations on confidence intervals for some studies, the authors did not consider it important for the main result.
- Indirectness can be related to differences in intervention. Among the 4 included studies, 2 applied aerobic intervention (Nitroen 2012, Pascoalino 2014), while 2 applied combined intervention, resistance and aerobic exercises (Haykowsky, 2009 and Kobashigawa, 1999). However, since it is already included as subgroup analysis the authors decided not rate down for inconsistency, but considering the differences in aerobic interventions (HIT and moderate continuous training, Nitroen, 2012 and Pascoalino, 2014, respectively), the authors rate down for indirectness.
- Considering not dichotomic outcomes, all data from imprecision were based on confidence intervals. Excepting Nitroen, 2012, all studies included included negative values in their confidence interval.
- There was 1 study included with high risk of bias due to unclear randomization and allocation concealed procedure further 30% of loss to followup (Pierce, 2007). Also, Wu, 2008 and Pascoalino 2014 scored as serious risk of bias also due to unclear randomization and allocation concealed procedure. No blinding were considered for data analysis in any study. The authors judged Kobashigawa, 1999, Haykowsky, 2009, Monk-Hansen, 2013, Nitroen, 2012 and Rustad, 2014 as not serious risk of bias.
- All data from imprecision were based on confidence interval and sample size. Considering 4 of the included studies crossed the neutral line and 3 did not crossed it, the authors decided to classify imprecision as serious.
- Although point estimates did not vary widely across studies and has showed overlap, the authors rated down for inconsistency due to high heterogeneity.
- All data from imprecision were based on confidence interval and sample size. The main concern for this outcome is the general low sample size. Also, although Wu, 2008 indicated no problems regarding confidence interval, Kobashigawa 1999 presented results in both directions of the forest plot.
- Considering only two studies were included for this outcome and the point estimates vary widely across them, the authors rated down for inconsistency.
- All studies presented positive and negative values in their minimum and maximum confidence interval.

Supplementary Figure S3: Summary of Findings Tables with quality of evidence for HIIT compared to moderate continous training.

Author(s)  
Question: What is the certainty of the evidence for the comparison in between HIIT and MCT-AE after Heart Transplantation?  
Setting: Exercise Training in Heart Transplantation  
Bibliography: Turri-Silva et al. 2020

| Certainty assessment |                   |              |               |                      |             |                      | N. of patients |        | Effect            |                                             | Certainty                                                                                    | Importance |
|----------------------|-------------------|--------------|---------------|----------------------|-------------|----------------------|----------------|--------|-------------------|---------------------------------------------|----------------------------------------------------------------------------------------------|------------|
| N. of studies        | Study design      | Risk of bias | Inconsistency | Indirectness         | Imprecision | Other considerations | HIIT           | MCT-AE | Relative (95% CI) | Absolute (95% CI)                           |                                                                                              |            |
| VO2 peak             |                   |              |               |                      |             |                      |                |        |                   |                                             |                                                                                              |            |
| 2                    | randomised trials | not serious  | not serious   | serious <sup>a</sup> | not serious | none                 | 53             | 57     | -                 | MD 1.96 higher (0.99 higher to 2.93 higher) |  MODERATE |            |

CI: Confidence interval; MD: Mean difference

**Explanations**

<sup>a</sup> There are some differences in regards the training prescription. On Nytroen 2019 the HIIT intervention took longer than Dall 2014. Also, HIIT was not the only kind of exercise on Nytroen 2019, since the authors also included resistance training sections during some months. So, the evidence is not only direct provenient from HIIT protocols.
