# Supplementary material for: Impact of Exercise Modalities on Peripheral and Central Components of Cardiorespiratory Capacity in Heart Transplantation Patients: A Systematic Review and Meta-Analysis
Source: Medicina (Kaunas). 2021 Dec 24;58(1):32. doi: 10.3390/medicina58010032 (PMC8779927; doi:10.3390/medicina58010032)
Supplement: Supplementary file 1 [file medicina-58-00032-s001.zip › MA_Medicina_data.xlsx]

## Sheet: Planilha1
Variável	Estudo	Tipo de exercício	Grupo intervenção							Grupo controle
			N	Pre	SD	Pós	SD	Change Mean	Change SD	N	Pre	SD	Pós	SD	Change Mean	Change SD	Correction intervention	correction control	mean corr	grau de liberdade	p value training vs control
FMD	Braith, 2008	Aerobic	9	10	6.1	9.6	6.2	-0.4		7	10.5	2.8	7.9	5.1	-2.6					14
	Hermann, 2011	Aerobic	14	8.3	1.3	11.4	1.2	3.1		13	5.6	1	5.3	1.7	-0.3					25	0.024
	Haykowsky, 2009	Combined	22	4	6.8	5.3	4.9	1.3	7.3	21	3.2	4	3.9	5.2	0.7	6.9	0.254502	-0.109856	0.072323	41
	Braith, 2008	Aerobic	9	4.74	0.87	4.64	0.82	-0.1		7	4.48	0.55	4.43	0.59	-0.05					14
diameter_rest	Hermann, 2011	Aerobic	14	4.74	0.16	4.67	0.2	-0.07		13	4.63	0.25	4.7	0.23	0.07					25
	Haykowsky, 2009	Combined	22	4.85	1.1	5	0.93	0.15	0.74	21	5.47	0.85	5.41	1.1	-0.06	0.54	0.746481	0.877487	0.811984	41
VO2 peak	Tegtbur, 2003	Aerobic	20	18.8	4.2	20.1	4.2	1.3		12	19.3	4.5	18.5	2.8	-0.8					30
	Bernardi, 2007	Aerobic	13	14.9	1.23	19.6	0.65	4.7		11	14.3	1.24	15.6	1.76	1.3					22
	Braith, 2008	Aerobic	9	15.4	4.3	19.4	5.5	4		7	16.2	5.2	16.8	2.8	0.6					14
	Hermann, 2011	Aerobic	14	23.9	6.7	28.3	6.1	4.4		13	24.6	5	23.4	5.7	-1.2					25	0.0009
	Nytrøen, 2012	Aerobic	24	27.7	5.5	30.9	5.3	3.2		26	28.5	7	28	6.7	-0.5					48
	Monkhansen 2014	Aerobic	13	23.9	7	28.3	6.4	4.4		10	24.6	4.5	24	5.5	-0.6					21	0.002
	Pascoalino, 2015	Aerobic	31	21.1	5.5	23.2	6.6	2.1		9	20.8	5.4	20.1	4.5	-0.7					38
	Kobashigawa 1999	Combined	14	9.2		13.6		4.4		13	10.4		12.3		1.9					25
	Wu, 2008	Combined	14	12.1	2.7	13.2	3.9	1	2.5	23	13.7	3.3	13.2	2.7	-0.5	1.8				35
	Haykowsky, 2009	Combined	22	21.2	7.3	24.7	8.8	3.43	3.3	21	18.2	5.9	18.2	5.3	0.04	2.2				41
Heart Rate peak	Monkhansen 2014	Aerobic / HIIT	13	149	8	144	16	-5		10	141	22	136	20	-5					21	0.124
	Nitroen 2012	Aerobic / HIIT	26	159	14	163	13	4		26	154	15	153	17	-1					50
	Pascoalino, 2015	Aerobic	31	127	4	133	4	6		9	127	5	129	4	2					38
	Pierce 2008	Aerobic	8	121	16	131.4	22	10.4		6	131.1	12	141.1	13	10					12
	Haykowsky, 2009	Combined	22	147	18	154	15	7	11	21	139.1	19	139	20	-0.05	9				41
	Kobashigawa 1999	Combined	14	102		125		23		13	107		134		27					25
	Wu, 2008	Combined	14	120.6	15.8	121.6	16.7	1.1	10	23	132.7	15.7	130.8	14.1	-2	8.7				35
SBP peak	Nitroen 2012	Aerobic / HIIT	26	181	33	211	66	30		26	197	22	191	32	-6					50
	Pascoalino, 2015	Aerobic	31	139	4	142	4	3		9	147	8	152	7	5					38
	Haykowsky, 2009	Combined	22	175	26	177	21	2	18	21	172	29	180	27	8					41
	Kobashigawa 1999	Combined	14	141		148		7		13	139		148		9					25
VE/VCO2 slope	Nitroen 2012	Aerobic / HIIT	26	29.4	3.4	28.7	2.6	-0.7		26	29.1	3.2	28.8	3.7	-0.3					50
	Pascoalino, 2015	Aerobic	31	33.1	1.3	31.5	1.1	-1.6		9	30.1	1.6	30.4	1.6	0.3					38
DBP Peak	Nitroen 2012	Aerobic / HIIT	26	71	15	80	14	9		26	83	14	91	35	8					50
	Pascoalino, 2015	Aerobic	31	79	2	74	3	-5		9	85	7	85	8	0					38
	Haykowsky, 2009	Combined	22	81	9	79	9	-2.1	12.6	21	81	8	80	9	-1.2	7.6				41
1RM chest press	Braith 1998	RT	7	40.5	14	69.1	20	28.6		7	41.8	7.2	50.1	6.7	8.3					12
	Braith 2005	RT	7	84.82	26.3	131	28.5	46.18		6	59	23.5	74.3	24	15.3					11
1RM leg extension	Braith 1998	RT	7	74.8	24	115	24	40.2		7	77.7	25	89.2	23	11.5					12
	Braith 2005	RT	7	97.06	8.6	136	10.8	38.94		6	81.6	5	92	4.5	10.4					11
Sitting-to-stand test	Wu 2008	Combined	14	21.1	5.2	26.1	6.3	5.1	3.6	23	27	5.5	26.6	5.1	-0.4	4				35
	Kobashigawa 1999	Combined	14	10.6		23.9		13.3		13	12.3		17.9		5.6					25
